# Supplementary material for: Physician Coaching by Professionally Trained Peers for Burnout and Well-Being: A Randomized Clinical Trial
Source: PubMed Central journal article supplement (PMC11015346; doi:10.1001/jamanetworkopen.2024.5645), 2024-04-12
Supplement: jamanetwopen-e245645-s002.pdf [file jamanetwopen-e245645-s002.pdf]

## Supplemental Online Content

Kiser SB, Sterns JD, Lai PY, Horick NK, Palamara K. Physician coaching by professionally trained peers for burnout and well-being: a randomized clinical trial. *JAMA Netw Open*. 2024;7(4):e245645. doi:10.1001/jamanetworkopen.2024.5645

**eTable 1.** Cost of Coaching Per Participant

**eTable 2.** Comments and Themes About Coaching Changes

### **eReference**

This supplemental material has been provided by the authors to give readers additional information about their work.

**eTable 1.** Cost of Coaching Per Participant

|                                                 | Cost       | Notes            |
|-------------------------------------------------|------------|------------------|
| Coach Training (13 coaches at \$2350 each)      | \$30,550   | Wellcoaches Cost |
| Coach Payments (252 coaching hours at \$200/hr) | \$50,400   |                  |
| Total Cost                                      | \$80,950   |                  |
| Cost per participant (52) including training    | \$1,556.73 | Onboarding cost  |
| Cost per participant (52) excluding training    | \$969.23   | Ongoing cost     |
|                                                 |            |                  |
| Cost of Mayo study per participant <sup>1</sup> | \$1,400    |                  |
| Cost differential onboarding                    | (\$156.73) |                  |
| Cost differential ongoing                       | \$430.77   |                  |

**eTable 2.** Comments and Themes About Coaching Changes

| What changes did you make as a result of coaching?                                                                                                                                                                                                                                                                                                                                                                                        | Theme                                                                  |
|-------------------------------------------------------------------------------------------------------------------------------------------------------------------------------------------------------------------------------------------------------------------------------------------------------------------------------------------------------------------------------------------------------------------------------------------|------------------------------------------------------------------------|
| Think about things in a more objective organized manner                                                                                                                                                                                                                                                                                                                                                                                   | Addressing workload                                                    |
| Less angry and overwhelmed                                                                                                                                                                                                                                                                                                                                                                                                                | Addressing workload                                                    |
| I felt much more encouraged about my work. I set goals and achieved them. I felt more optimistic about my work, more in line with how it should be.                                                                                                                                                                                                                                                                                       | Addressing workload                                                    |
| I have made many structural changes to my day to foster focused goal-oriented work. I also made changes to how I receive notifications, and to how I alert patients to results, coordinate follow-up, etc.                                                                                                                                                                                                                                | Addressing workload                                                    |
| Considered my leadership strengths                                                                                                                                                                                                                                                                                                                                                                                                        | Building leadership skills                                             |
| Considered my goals for leadership                                                                                                                                                                                                                                                                                                                                                                                                        | Building leadership skills                                             |
| Strategizing                                                                                                                                                                                                                                                                                                                                                                                                                              | Building leadership skills                                             |
| Better planning before difficult conversations                                                                                                                                                                                                                                                                                                                                                                                            | Building leadership skills                                             |
| Delegating more to support staff                                                                                                                                                                                                                                                                                                                                                                                                          | Building leadership skills                                             |
| Use my voice Believe in what I have to offer Be clear in agenda setting with meetings<br>View meetings as information gathering rather than judgements                                                                                                                                                                                                                                                                                    | Building leadership skills                                             |
| increased proactive communication with colleagues and mentors.                                                                                                                                                                                                                                                                                                                                                                            | Building leadership skills                                             |
| Clarify leadership style, re-structure team structure and reset priorities                                                                                                                                                                                                                                                                                                                                                                | Building leadership skills                                             |
| More awareness of my personality having strengths, rather than weaknesses. Accepting my introverted personality works best 1:1, rather than dominating large group meetings. Dealing with meeting agendas before and after the meeting. Previously worried that I am unable to make decisions for fear of being wrong. Now, accepting that listening to others before making a decision does not always show weakness and indecisiveness. | Building leadership skills                                             |
| I focused on the environments that I do have the ability to make psychological safety for those that I work with. Instead of being afraid and siloing myself off I have made an effort to check in with friends and colleagues to both support them and to realize the support that I do have. I do not say that I am fine when I am not fine.                                                                                            | Building social support and community at work                          |
| No major change; just an internal understanding that I am actually happy with the status quo and don't need or desire change.                                                                                                                                                                                                                                                                                                             | Building social support and community at work                          |
| Integrating mindfulness to daily life                                                                                                                                                                                                                                                                                                                                                                                                     | Engaging in self-care                                                  |
| Improved weight and sleep                                                                                                                                                                                                                                                                                                                                                                                                                 | Engaging in self-care                                                  |
| Stress reduction                                                                                                                                                                                                                                                                                                                                                                                                                          | Engaging in self-care                                                  |
| increased self care                                                                                                                                                                                                                                                                                                                                                                                                                       | Engaging in self-care                                                  |
| Thinking longer term for priorities and goals                                                                                                                                                                                                                                                                                                                                                                                             | Forging career paths aligned with personal and/or institutional values |
| I got more concrete about my various plans and goals                                                                                                                                                                                                                                                                                                                                                                                      | Forging career paths aligned with personal and/or institutional values |
| Dedicated "focus time" multiple times/week                                                                                                                                                                                                                                                                                                                                                                                                | Improving work efficiency                                              |
| I learned to say "no" and prioritize my tasks.                                                                                                                                                                                                                                                                                                                                                                                            | Improving work efficiency                                              |

|                                                                                                                                                                                                                                                                                                                                                                                                                                                      |                                                          |
|------------------------------------------------------------------------------------------------------------------------------------------------------------------------------------------------------------------------------------------------------------------------------------------------------------------------------------------------------------------------------------------------------------------------------------------------------|----------------------------------------------------------|
| I am much more aware of my perfectionist tendencies and able to acknowledge them and put them aside more than I was able to before thereby increasing my efficiency at work; changed my perspective on public speaking and have become less anxious about it as a result; gained perspective on my feelings of impostor syndrome and am starting to feel more confident in work situations as a result.<br>Made note templates to speed note writing | Improving work efficiency                                |
| Note writing efficiency                                                                                                                                                                                                                                                                                                                                                                                                                              | Improving work efficiency                                |
| Implemented some strategies to reduce uncertainty when I was delivering clinical care, like previewing caseload for the next day and working on treatment plan ahead of time                                                                                                                                                                                                                                                                         | Improving work efficiency                                |
| Looking ever more closely at reducing my time at work and pursuing other, more rewarding, activities.                                                                                                                                                                                                                                                                                                                                                | Integrating personal and professional life               |
| Changed my morning routine to balance personal needs and preparation for the work day.<br>Prioritized pre-charting every morning                                                                                                                                                                                                                                                                                                                     | Integrating personal and professional life               |
| Shut off work more when with family                                                                                                                                                                                                                                                                                                                                                                                                                  | Integrating personal and professional life               |
| Better work life balance                                                                                                                                                                                                                                                                                                                                                                                                                             | Integrating personal and professional life               |
| Improved setting boundaries/limits with my time related to work                                                                                                                                                                                                                                                                                                                                                                                      | Integrating personal and professional life               |
| Thinking about the meaning of work and goals<br>I am giving up some responsibilities to focus on other things that I find more fulfilling in my work and to hopefully have less stress.                                                                                                                                                                                                                                                              | Optimizing meaning in work<br>Optimizing meaning in work |
| More positive thinking                                                                                                                                                                                                                                                                                                                                                                                                                               | Optimizing meaning in work                               |
| I was able to slow down a bit and prioritize some things, as well as making specific plans to tackle some issues like making time to work on projects with "soft" deadlines.                                                                                                                                                                                                                                                                         | Promoting self-advocacy and efficacy                     |
| Let go about guilt about career path, made a dedicated plan for self-education next year, made a plan for improving as a medical educator, more self-reflection and honesty                                                                                                                                                                                                                                                                          | Promoting self-advocacy and efficacy                     |
| Took some concrete steps on some projects I'd been behind on. Made some changes in my work schedule to better reflect my professional aspirations.                                                                                                                                                                                                                                                                                                   | Promoting self-advocacy and efficacy                     |
| Reduced sessions at work. Changed template to allow time for urgent tasks during work days.                                                                                                                                                                                                                                                                                                                                                          | Promoting self-advocacy and efficacy                     |
| Small changes to ensure that I do regular things to take care of my health, feel good about my accomplishments, have quality moments with my family.                                                                                                                                                                                                                                                                                                 | Promoting self-advocacy and efficacy                     |
| I blocked time from my schedule one morning a week and started taking art lessons during that time to help reduce burnout and isolation I was experiencing with working from home. I addressed an issue with a colleague that had been bothering me.                                                                                                                                                                                                 | Promoting self-advocacy and efficacy                     |

|                                                                                                                                                                                                                                                                                                                                                              |                                             |
|--------------------------------------------------------------------------------------------------------------------------------------------------------------------------------------------------------------------------------------------------------------------------------------------------------------------------------------------------------------|---------------------------------------------|
| I am engaging in more mindfulness, taking time for myself and setting boundaries with others. I am more able to protect my "me" time.                                                                                                                                                                                                                        | Promoting self-advocacy and efficacy        |
| Being better at recognizing my worth and what I am able to accomplish                                                                                                                                                                                                                                                                                        | Promoting self-advocacy and efficacy        |
| Setting realistic goals                                                                                                                                                                                                                                                                                                                                      | Promoting self-advocacy and efficacy        |
| More self-compassion. Modifying negative thought patterns. Openness of communication and vulnerability.                                                                                                                                                                                                                                                      | Promoting self-advocacy and efficacy        |
| Improved approach/mindfulness around self-critique.                                                                                                                                                                                                                                                                                                          | Promoting self-advocacy and efficacy        |
| I felt more confident and felt like she provided strategies to make me cope better with my own sense of insecurity.                                                                                                                                                                                                                                          | Promoting self-advocacy and efficacy        |
| More self compassion and introspection                                                                                                                                                                                                                                                                                                                       | Promoting self-advocacy and efficacy        |
| I am definitely working to advocate for myself. Before this experience, it was difficult for me to put my finger on why I felt somewhat stagnant and approaching burnout in my career. Now I have a clearer picture of what I want and also a framework for how to make future career choices.                                                               | Promoting self-advocacy and efficacy        |
| I began to set goals related to promotion while also exploring opportunities to transition to a new location. I felt that goal-setting and reframing my thinking towards a more positive/goal-directed way helped with many things that were causing cognitive burden/load including how disorganized some things have been at work (outside of my control). | Promoting self-advocacy and efficacy        |
| I had more clarity of my goals and am pursuing new job avenues.                                                                                                                                                                                                                                                                                              | Pursuing new opportunities                  |
| Felt more open-ness to exploring roles outside of the instutution                                                                                                                                                                                                                                                                                            | Pursuing new opportunities                  |
| Listening to my "inner voice" as I am interacting with people in difficult situations.                                                                                                                                                                                                                                                                       | Resolving interpersonal conflict            |
| More effort to build personal friendships outside of work                                                                                                                                                                                                                                                                                                    | Strengthening relationships outside of work |

## eReference

1. Dyrbye LN, Shanafelt TD, Gill PR, Satele DV, West CP. Effect of a professional coaching intervention on the well-being and distress of physicians: a pilot randomized clinical trial. *JAMA Intern Med.* 2019;179(10):1406-1414. Medline:31380892 doi:10.1001/jamainternmed.2019.2425
