# Supplementary material for: Physician Coaching by Professionally Trained Peers for Burnout and Well-Being: A Randomized Clinical Trial
Source: PubMed Central journal article supplement (PMC11015346; doi:10.1001/jamanetworkopen.2024.5645), 2024-04-12
Supplement: jamanetwopen-e245645-s003.pdf [file jamanetwopen-e245645-s003.pdf]

## **Data Sharing Statement**

Kiser. Physician Coaching by Professionally Trained Peers for Burnout and Well-Being. *JAMA Netw Open*. Published April 12, 2024. doi:10.1001/jamanetworkopen.2024.5645

### **Data**

**Data available:** No
